# Homeostatic mechanisms may shape the type and duration of oscillatory modulation.

Erik J. Peterson<sup>1,2,\*</sup> and Bradley Voytek<sup>2,3,4</sup>

<sup>1</sup>Department of Psychology, Carnegie Mellon University, Pittsburgh, PA 15213

<sup>2</sup>Department of Cognitive Science,

<sup>3</sup>Neurosciences Graduate Program,

<sup>4</sup>Halicioğlu Data Science Institute, University of California, San Diego, 92093

\*Corresponding author: Erik.Exists@gmail.com

## Abstract

Neural oscillations are observed ubiquitously in the mammalian brain. However the stability of oscillations is highly variable. Some oscillations are *tonic*, lasting for seconds or even minutes; others are unstable, appearing only as a single-cycle *burst*. In a model of hippocampal neurons, we use numerical simulations to show how these different forms of rhythm stability can interact with activity-dependent homeostasis to profoundly alter the modulatory effect of neural oscillations. Under homeostasis, tonic oscillations that are synaptically excitatory have a paradoxical effect; they decrease excitability and desynchronizing firing. Tonic oscillations that are synaptically inhibitory—like those in a real hippocampus—fail to generate new action potentials and so provoke no homeostatic response. This may explain why the theta rhythm in hippocampus is synaptically inhibitory: inhibitory oscillations don't raise the firing threshold, as excitatory oscillations do, and so can preserve each cell's dynamic range. Based on these simulations, we also speculate that homeostasis may explain why excitatory intra-cortical and intra-layer oscillations often appear as bursts. In our model bursts minimally interact with the slow homeostasis time constant and so retain typical excitatory effects.

## Introduction

NEUROMODULATION AND HOMEOSTASIS are inter-linked but opposing phenomena. Modulation perturbs excitability, which we define as the propensity for a stimulus to elicit an action potential. Homeostasis acts to quench perturbation, driving the excitability of the cell back to a biologically desirable set point [21, 1]. While the interplay between chemical modulators and homeostasis has been studied for more than 20 years [21, 1, 12, 26, 27, 13], the relationship between network-level synaptic modulations—like neural oscillations—and homeostasis is not well understood, on either theoretical or empirical grounds. Like neuromodulators, neural oscillations alter excitability and firing statistics. Uniquely, though, oscillations create synchronous windows of activity [22, 42]. Temporally grouping action potentials into windows improves signal to noise and increases the number of coincident firing events [8, 45, 43, 35], driving learning at individual synapses [32, 39, 29].

We propose the same mechanisms that link homeostasis with chemical neuromodulation can also come into play during oscillatory modulation. After all, both kinds of modulation lead to tonic changes in spiking and in  $\text{Ca}^{2+}$  concentration, which can in turn drive changes to intrinsic homeostasis [23].

To test this, we model activity-dependent intrinsic homeostasis in a feed-forward population of hippocampal pyramidal cells [38]. In this model homeostasis is mediated by a  $\text{Ca}^{2+}$ -dependent mechanism [12, 26, 27, 13, 34] pioneered by LeMasson [21, 1]. In this model,  $\text{Ca}^{2+}$  acts a sensor or proxy for tonic changes in the membrane voltage. To counter tonic changes in  $\text{Ca}^{2+}$  levels, the expression of ion channels is altered, returning the  $\text{Ca}^{2+}$  level to a predefined “good” value [12, 33]. Following Siegel [38], increases in  $\text{Ca}^{2+}$  lead to downregulation of  $\text{Na}^+$  and  $\text{Ca}^{2+}$  channels, and upregulation of fast  $\text{K}^+$  channels. To minimize the effect of homeostasis on the rise and fall of

action potential dynamics, we also add a KCa channel which is not present in Siegel [38]. In real cells intrinsic homeostasis changes the expression level, membrane trafficking, and kinetics of ion channels. Here, these details are not directly simulated. Instead we mimic the net or bulk effect of all these changes by altering the maximum conductance of individual ionic channels, which are modelled using Hodgkin-Huxley terms [21, 33, 34].

Given that chemical modulators operate on both short and long timescales [28, 26, 9, 10], we examined two timescales of oscillation. We contrast the effects of short bursts of oscillation to long lasting tonic rhythms, both of which are observed *in vivo*, and which may play different physiological, cognitive, and computational roles [24, 41]. We also explore how oscillation duration interacts with synapse type, examining both AMPA- or GABA-ergic oscillations.

In our highly simplified model of hippocampal cells, intrinsic homeostasis can profoundly alter the modulatory effect of neural oscillations. *Tonic* excitatory modulation, paradoxically, generates a homeostatic response that increases the firing threshold. This suppresses excitability which, in turn, desynchronizes population activity. *Bursts* of excitation, meanwhile, don't show homeostatic suppression, and may even benefit from a weak level of homeostasis. This is due to the constant noisy background level input also present in the model, which homeostatic mechanisms help control. Inhibitory GABAergic oscillations, however, show little to no homeostatic effect, suggesting that inhibitory oscillations might better isolate any phase coding scheme from the stimulus-driven response. This might be important, for example, in hippocampal phase-coding schemes of memory [22].

## Results

We study  $\text{Ca}^{2+}$ -mediated homeostasis in a feed-forward network, using single compartment neurons. We modulate this network using neural oscillations. Oscillations are simulated either as tonic, lasting for the entire experiment, or may as a burst at the end, where it overlaps with input stimulus (Figure 1a). Input into the model has both a constant background level of noise (not shown), and a stronger stimulus that is delivered once homeostatic equilibrium is reached [2] (Figure 1). During this strong stimulus we measure the network's response and how population firing and synchrony are affected by homeostasis under different oscillatory regimes.

Each experiment began with an instantiation of a randomly generated feed-forward network. A single neuron from this network is depicted in Figure 1b. This network is subjected to a range of modulatory and control conditions, including oscillatory strength, duration, and synapse type (AMPA or GABA). Each experiment lasted 20 seconds. In Figure 1c we depict key aspects of model output during an experiment. In real systems, intrinsic homeostasis is thought to happen over minutes or days. However, simulation times that are hours or days long are not computationally feasible. As a result, we follow the field and study a model where  $\text{Ca}^{2+}$  dynamics happen with a 4-second half-life, denoted by  $\tau_h$ . Despite the radical difference between real and simulated time-scales, all that matters mathematically is that  $\text{Ca}^{2+}$  dynamics happen much slower than all the other synaptic/membrane dynamics. In practice, this means a timescale of  $\tau_h > 4$  seconds is a reasonable first-order approximation [12, 26, 27, 13, 26, 34, 21, 1].

After homeostatic equilibrium is reached, we measure two features: the synchrony between action potentials (measured by the Kappa correlation) and changes in the excitability of the system (measured as a change in population firing rate). Both of which are defined in the *Methods*. To ensure a consistent comparison between experiments, measurements were made over the same 4-cycle or 0.5 second period in all simulations.

### Excitatory modulation.

Homeostasis completely inverts the effect of tonic AMPAergic oscillatory modulation. To see how, first consider how the network responds to a tonic excitatory modulation without homeostasis. Without homeostasis, increasing the strength of the excitatory oscillation increases excitability, leading to an increase in the population firing rate. Additionally, the neuromodulatory effect of the oscillations is such that action potentials are grouped by oscillation phase, resulting in an increase in population synchrony (Figure 2b, black line). With homeostasis this pattern inverts. As excitatory oscillatory modulation strength increases, synchrony and excitability *decreases* (Figure 2c-d). Homeostatic mechanisms in the model cause what *should be* excitatory synchronizing

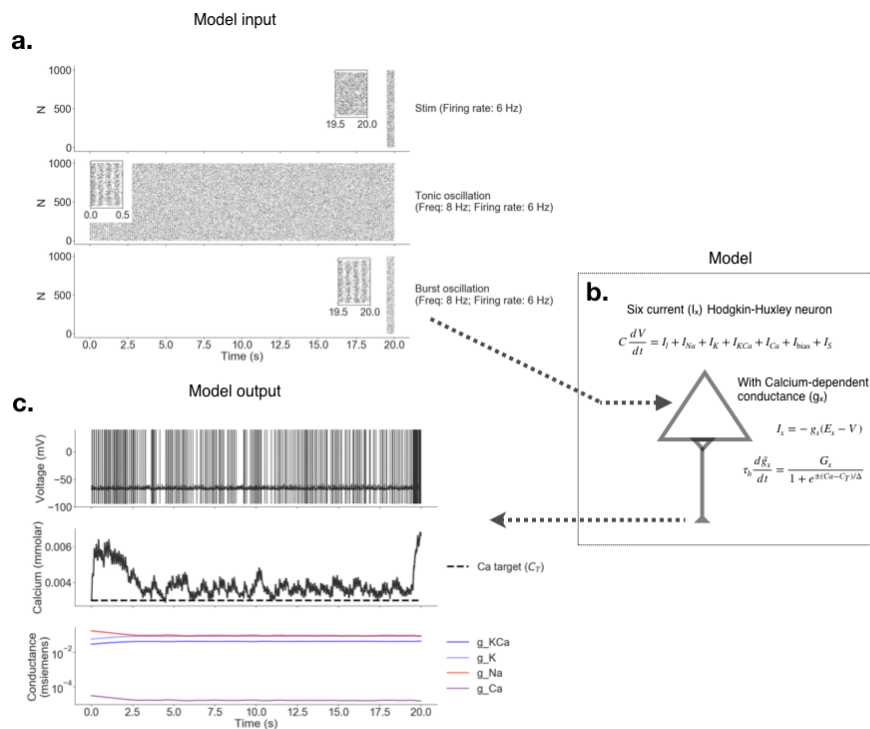

Figure 1: Diagram of the model. **a.** Inputs into the model. Top panel depicts the stimulus, applied over the last 0.5 seconds of each simulated trial. Middle and bottom panels depict the two modes of oscillation we examined—tonic and bursting. **b.** Illustration of a single model neuron, its major currents, its inputs (top arrow) and its output (bottom arrow). **c.** Examples of model output, including membrane potential (top panel),  $Ca^{2+}$  concentration, both observed (solid) and the homeostatic target (dotted line). The bottom panel in c. shows homeostatic dynamics beginning with trial onset, followed by a delay to equilibrium over 20 seconds. Note that there is no homeostatic response to stimulus onset at 19.5 seconds. Also note the log scale on the y axis in this panel.

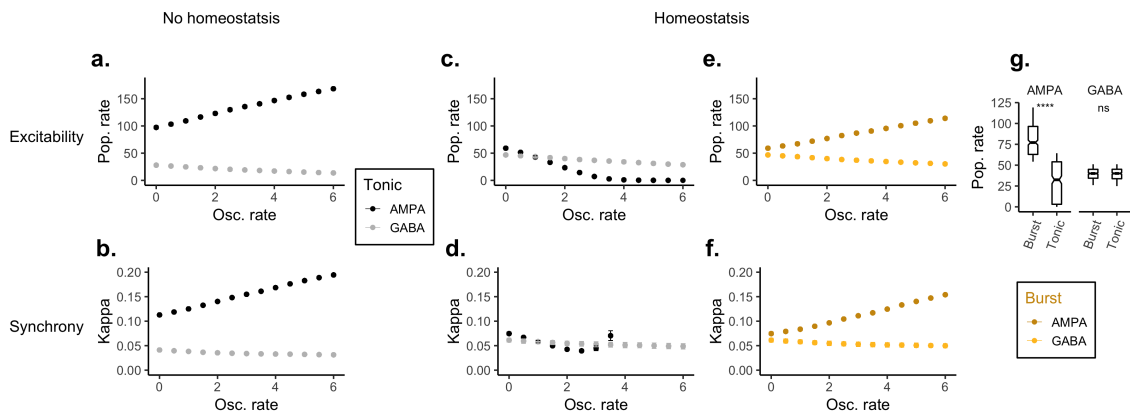

Figure 2: The effect of oscillatory modulation on synchrony—which is measured using the Kappa correlation (Eq 9)—and excitability, measured by the population firing rate. Tonic oscillations are shown in grey and black. Bursts are shown in light and dark yellow. **a-b.** Increases in tonic modulation strength, without homeostasis. This is our reference condition. Top panel (a.) is the observed population firing rate averaged over the 0.5 second stimulus. Bottom (b.) is synchrony over the same period. **c-d.** Same experiment as a-b but with Calcium-mediated homeostasis, showing how homeostasis with tonic AMPA oscillations reduces population firing and synchrony. **e-f.** Burst modulation, presented during the stimulus period (4 cycles of oscillation, onset time: 19.5 s). **g.** Change in excitability between bursts and tonic rhythms for all oscillation firing rates. Asterisks denote a significant difference using the Wilcoxon rank sum test ( $W = 1886.5, p < 2.2e - 16$ ). The frequency of the oscillatory rhythm was fixed at  $f = 8$  in all models.

modulation to become suppressive and desynchronizing. The stronger the oscillation, the more suppressive the result. By the time the oscillation is about half the strength of the stimulus (which we fix at a firing rate of 6 Hz) the stimulus is completely suppressed (*i.e.*, the population firing rate approaches 0) (Figure 2c).

We compared the effect of tonic oscillation to short 4-cycle bursts of excitatory modulation, presented only during the stimulus. Here, the oscillation period is far too short to engage any additional homeostasis. This means that increases in oscillatory strength continue to increase population firing rate and synchrony (Figure 2e and f).

Our model suggests tonic oscillations can profoundly alter coding properties of synaptically excitatory oscillations. This means that bursts of excitatory oscillation are *qualitatively distinct* from their tonic counterparts. The decrease in excitability caused by tonic oscillation can be explained by a direct homeostatic change. Larger tonic oscillations lead to larger tonic increases in the membrane potential, which in turn raise  $Ca^{2+}$  levels. The homeostatic equations respond to this change  $Ca^{2+}$  by decreasing the conductance of the Na and Ca channels, and increasing the conductance of K and KCa channels (Eq 6). The net effect of these dynamics is a increase in the firing threshold.

The inversion in Kappa seen in Figure 2d as well as in 3b, is an artifact of the decrease in excitability; it's a low effect  $N$  effect. As population spiking becomes more strongly suppressed the total number of spikes declines to the point where the bins used to calculate Kappa often contain no spikes. This in turn inflates Kappa values.

## Inhibitory modulation.

Both sustained tonic and bursting inhibitory oscillatory modulation do not lead to a homeostatic response in our model. In all cases, as oscillatory strength increases, population firing declines dramatically (grey lines in Figure 2a-d and light yellow lines in panel e-f).

## The effect of $Ca^{2+}$ concentration.

When the model is run with only stimulus-driven homeostasis, the  $Ca^{2+}$  concentration equilibrates to about 0.003 mM. We used this as a standard target value for all modulation experiments, until

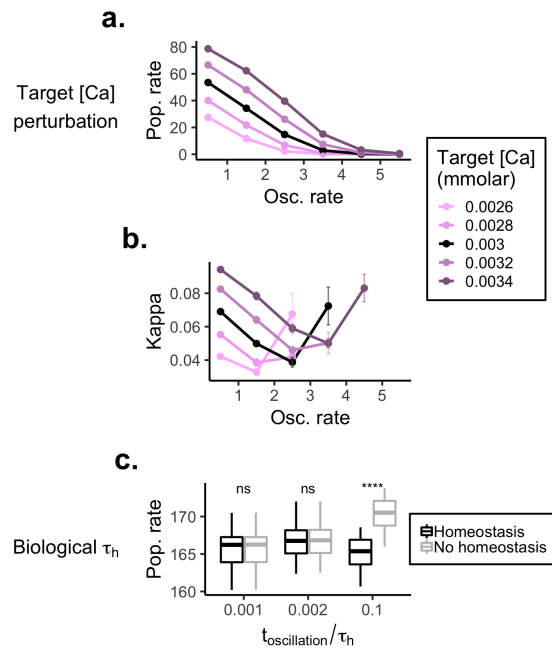

Figure 3: Synchrony and excitability shift linearly with the target Calcium concentration, [Ca]. Plotted here is the effect of  $\text{Ca}^{2+}$  on a tonic excitatory modulation. The black value (0.003 mM) is the standard reference value used in all previous simulations. **a.** Change in population hippocampal population rate for different levels of target [Ca] (colors) as a function oscillation strength (Osc. rate on the x-axis). All values are referenced to a no-modulation control. **b.** Change in population synchrony for different levels of target [Ca] (colors) as a function oscillation strength (firing rate). All values are referenced to a no-modulation control. **c.** Change in population rate as the oscillation duration approaches a more realistic  $\tau_h$ , the half-life of the homeostasis dynamics (Eq. 6). In this control experiment we used a more biologically realistic  $\tau_h$  of 600 s (or 10 minutes). All other simulations in the report use a  $\tau_h$  of 4 seconds, which is well below most reports of this value in real systems. However in choosing such as small value we follow the majority of the homeostasis modeling literature (for more on this see the *Discussion*).

now. When we vary this value in 0.0002 mM increments, population rate and synchrony either increases or decreases depending on whether the  $\text{Ca}^{2+}$  increases or decreases, shown Figure 3a-b. However despite different initial  $\text{Ca}^{2+}$  concentrations, each model still shows an identical set of trends as the strength of the oscillation increases (Figure 3). That is, increasing or decreasing the target concentration shifts the overall excitability of the network, in an approximately linear way. This means that while the initial choice of 0.003 mM was arbitrary, the qualitative pattern of results we report is not dependent on this choice.

## Discussion

Our scientific understanding of homeostasis has been shaped as much by theoretical work as empirical [26]. In an attempt to understand the interaction between oscillatory modulations and homeostasis, we begin by studying one of the simplest models used in early studies of homeostasis—a population of point neurons [21].

The feed-forward model of hippocampal pyramidal cells studied here serves as a simple initial model to answer three basic questions. One, do tonic oscillations—generated with biologically-consistent parameters—engage homeostatic mechanisms? Two, does homeostasis in turn change the oscillation's function? Three, do short bursts of oscillation have distinct effects from tonic oscillations? Put another way: can homeostasis help explain why some oscillations, such as hippocampal theta, tend to appear as tonic rhythms while other oscillations tend to appear as bursts? Our results suggest that homeostasis can explain why hippocampal theta is synaptically inhibitory, and why cortical oscillations often appear as bursts.

Bursting, rather than sustained, oscillations tend to be common in the cortex. One striking example is in motor cortical regions, where beta (12-30 Hz) bursts are prevalent and likely functional. Specifically, beta bursts are very short—sometimes lasting only one or two cycles [37]—and relate to self-timed movements [11]. Patients with Parkinson’s disease show increased motor rigidity and bradykinesia, symptoms associated with prolongation of beta bursts [40]. Levodopa treatment was shown to decrease burst probability and duration, and that decrease in burst duration correlated with motor improvement [40].

While many neocortical oscillations tend to be bursty, a counterexample is visual cortical alpha, which can become tonic and high power when humans rest with their eyes closed. Even though both cortical and sub-cortical alpha generators are synaptically excitatory, this rhythm had been classically and paradoxically associated suppression of excitability [18, 3, 35]. While several competing explanations have been offered [3, 20, 35] for this paradox, our work raises another possibility. Though we modelled hippocampal cells, the same  $\text{Ca}^{2+}$  homeostatic mechanisms exist in neocortex. Meaning strong and tonic alpha oscillations, combined with homeostasis, directly suppress population firing in visual cortex. Such an effect, were it to occur, would last well past the moment of oscillation offset. In fact, such long term effects of alpha have been reported in the literature, though the physiological mechanism was often unclear. Our work suggests that intrinsic homeostasis may underlie these effects.

## Limitations

The nature of our model—that fact we use point neurons with only 6 currents—or the fact that our model is strictly feed-forward—without lateral or recurrent connections—means we don’t know with confidence to what degree our model’s effects will appear in more complex models, or in real neural systems. For example, the primate or rat hippocampus. We do know, however, that oscillations are a ubiquitous feature of cortical activity, as is  $\text{Ca}^{2+}$ -mediated intrinsic homeostasis. This means the ingredients for oscillation and homeostasis to interact are omnipresent in both sub-cortical and cortical areas.

Homeostatic interactions depend on a number of factors specific to each cell and circuit. These include the duty cycle, power, and frequency of an oscillation, as well as on synaptic strengths and their location in the dendritic tree (an idea we return to below). It also depends on the other inputs into the cell, both from fast synaptic transmission and other (slower) modulators, as well as a connection type; simulation studies suggest that recurrent connections can strongly interact with homeostatic regulation [14]. The temporal and spatial scales of these factors will strongly influence  $\text{Ca}^{2+}$  dynamics, which is in turn central to governing what, if any, homeostatic effects oscillations may generate.

Synaptic homeostasis may also play a role in tuning a neuron’s response to all types of oscillatory perturbations, as both excitatory and inhibitory synapses are susceptible [6], though in the case of excitatory modulation synaptic and intrinsic homeostasis appear to be linked [19]. Still, the exact nature of the response depends on how, and to what degree, oscillatory input and other sensory or internally driven “computational” inputs share synapses. This in turn requires considering complex dendritic arbors and their effect on homeostasis [21], neuromodulation [17, 16], and computation [25, 36, 30]. Considering these interacting effects together is the next step needed to develop a clearer biological understanding of modulatory oscillations. For inhibitory oscillations the case is even more complex:  $\text{Ca}^{2+}$  in these cells does not appear to regulate intrinsic homeostasis, but synaptic homeostasis is under a separate mechanism of control [19].

## Previous work

Homeostasis has been extensively studied in the rhythmic pacemaker present in the crab stomatogastric ganglion. Here homeostasis has been shown to stabilize self-organized oscillations [12], and interact with neuromodulation in a *highly* state dependent way [26, 27, 26]. However, this work has focused on how chemical neuromodulators affect the formation of a pacemaker, not how a pacemaker can modulate another, downstream, circuit. Which is our focus here.

The interaction between homeostasis and oscillations has previously been considered when the oscillatory input is treated as a signal, not a modulator. Cannon and Miller [7] explored how synaptic homeostasis can effectively minimize the effect of modulatory perturbations, thus maximizing mutual information between an incoming oscillatory signal and a single cell’s firing pattern.

Our analysis could be considered an inverse complement to [7]—we study how to minimize the perturbation caused by a modulatory oscillator, rather than how to maximize the transmission of an oscillator.

## Conclusion

Here, using a relatively simple model of hippocampal neurons, we observe a surprising—even paradoxical—result: that homeostatic effects can invert a normally synchronizing excitatory oscillatory neuromodulator and cause it to become inhibitory and desynchronizing.

Based on our simple model, we conjecture that intrinsic homeostasis may explain why tonic theta rhythms in the hippocampus are synaptically inhibitory. To make this clear, consider the alternative. If the theta rhythm was strong, tonic, and synaptically excitatory, our model suggests this could lead to an equally strong—but opposing—homeostatic response. According to our model, such as response means that the firing threshold increases and the likelihood a hippocampal neuron can respond to any given stimulation would decrease, perhaps markedly so.

In effect, strong excitatory oscillations consume a substantial portion of each cell's possible dynamic range. On the other hand inhibitory oscillations do not generate an intrinsic homeostatic response, and so leave the dynamic range of the neurons intact. This may also explain why neocortical oscillations tend to be short and bursty, and why some neurological disorders, such as Parkinson's disease, are associated with prolonged rhythms.

## Methods

### Mathematical model

We model a feedforward network of hippocampal neurons, subjected to oscillatory modulation. This is instantiated as  $N = 2000$  input cells connected to  $M = 100$  Hodgkin-Huxley neurons. The  $M$  cells in the network were tuned to mimic regular firing [4, 5]. The firing pattern of each input cell (both stimulus and modulation) is from a Poisson process, with a time-varying rate.  $N_o$  cells oscillate.  $N_s$  serve as input. For simplicity, we let  $N_o = \frac{N}{2}$  so  $N_o = N_s$ . All input cells have a  $p = 0.1$  connection probability to the hippocampal population. The synaptic weights for all  $N \rightarrow M$  connections  $w$  were independently sampled from a uniform distribution,  $w \sim \mathcal{U}(5, 50) \mu\text{S}$ . The firing rate of the oscillating population was governed by sinusoidal pacemaker, with amplitude  $A$  and frequency  $f$ , with the exact form  $r_o/2(1 + \sin(2\pi ft))$ . As a result,  $r_o$  defines the peak firing of the oscillation. The stimulus population was simply modeled by a fixed rate of 6 Hz ( $r_s$ ). The background firing rate  $r_b$  was constant, and set at 2 Hz.

Hodgkin-Huxley dynamics were governed by 4 active ionic currents ( $I_{Na}$ ,  $I_K$ ,  $I_{KCa}$ ,  $I_{Ca}$ ) and the passive leak current ( $I_l = g_l(E_l - V)$ ). Besides  $I_{Ca}$  (which is discussed below), active currents are governed by the standard Hodgkin and Huxley form [15]. Where  $m$  and  $h$  respectively track the opening and closing channel kinetics, and  $E$  is the channel appropriate Nernst reversal potential. See *Table 1* for the complete set of parameters.

$$I = \bar{g}m^p h^q (E - V) \quad (1)$$

The  $\text{Ca}^{2+}$  current  $I_{Ca}$  was governed by a form taken from the Morris-Lecar model [31, 21, 38].

$$I_{Ca} = g_{Ca} \left[ 1 + \tanh\left(\frac{V_1 - V}{V_2}\right) \right] (V_{Ca} - \bar{V}) \quad (2)$$

Overall membrane dynamics were governed by these internal ion conductances, a variable bias current  $I_{\text{bias}}$ , and the excitatory synaptic input term  $I_S$ , which contains both background, stimulus, and oscillatory terms. All synaptic input was in turn governed a single exponential kinetics, which we denote generically using an  $x$  subscript below. Though each synaptic input had different inputs, all models shared the same parameters. That is,  $\tau_x = \tau_b = \tau_s = \tau_o$  and  $\bar{g}_x = \bar{g}_b = \bar{g}_s = \bar{g}_o$ .

$$I_S = -g_b(E_s - V) + -g_s(E_s - V) + -g_o(E_o - V) \quad (3)$$

$$\tau_x \frac{dg_x}{dt} = -g_x + \bar{g}_x \delta(t - t_x^j) \quad (4)$$

$$C \frac{dV}{dt} = I_l + I_{Na} + I_K + I_{KCa} + I_{Ca} + I_{bias} + I_S \quad (5)$$

The intrinsic excitability is regulated by altering both inward and outward conductances in response to changes in  $Ca^{2+}$  concentration. Following the previous work [21] and [38], we modeled this by allowing the maximal conductances  $g_{Na}$ ,  $g_K$ ,  $g_{KCa}$ , and  $g_{Ca}$  to non-linearly vary in response to changes in  $Ca^{2+}$  concentration,  $Ca$ . During homeostatic equilibration, conductances drifted until the target  $Ca^{2+}$  concentration was met, denoted as  $C_T$ . In a control experiment a range of  $C_T$  values were explored (Figure 3), though simulations defaulting to 0.03 mM; the value the system reaches with stimulation ( $r_s = 6$  Hz) without modulation ( $r_o = 0$ ). The  $\pm$  symbol in equation 6 denotes the direction of ion flow and is (+) for inward going currents (Na and Ca) and (-) for outward going Potassium.

$$\tau_h \frac{dg_x}{dt} = \frac{G_x}{1 + e^{\pm(Ca - C_T)/\Delta}} \quad (6)$$

$Ca^{2+}$  dynamics were assumed to follow first order kinetics, driven by the  $Ca^{2+}$  influx current and clearance rate constant  $k$ . Values for both  $\gamma$  and  $k$  were taken from [23].

$$\frac{dCa}{dt} = -kCa - \gamma I_{Ca} \quad (7)$$

## Estimating excitability and synchrony

We measure excitability by comparing average firing rate of all  $M$  neurons in an experiment, with ( $r_m$ ) and without modulation ( $\bar{r}_m$ ). This accounts for any homeostatic drift driven only by the background noise:

$$\Delta r = \bar{r}_m - r_m \quad (8)$$

We measure synchrony using  $\kappa$ , a binned measure of spiking covariance [44]. Where  $X(l) = 0$  or 1 and  $Y(l) = 0$  or 1 for  $l = \{1, 2, \dots, K\}$  and with  $T/K = \tau$ .

$$\kappa_{ij}(\tau) = \frac{\sum_l^K X(l)Y(l)}{\sqrt{\sum_l^K X(l) \sum_l^K Y(l)}} \quad (9)$$

$$\kappa(\tau) = \frac{1}{N} \sum_i^N \sum_j^N \kappa(\tau)_{ij} \quad (10)$$



| Symbol           | Range (unit)              | Description                                  |
|------------------|---------------------------|----------------------------------------------|
| $f$              | 8 (Hz)                    | Oscillation frequency                        |
| $r_o$            | 0 - 6 (Hz)                | Oscillation firing rate                      |
| $r_s$            | 6 (Hz)                    | Stimulus firing rate                         |
| $C$              | 1 ( $\mu$ F)              | Membrane capacitance                         |
| $\tau_h$         | >4 (sec)                  | Homeostasis time constant                    |
| $w$              | 5 - 50 ( $\mu$ S)         | Synaptic weight                              |
| $\tau_e$         | 5 (msec)                  | Excitatory synaptic time constant            |
| $V_e$            | 0 (mV)                    | Excitatory synaptic reversal potential       |
| $p$              | 0.1                       | Connection probability                       |
| $C_T$            | 0.0028-0.0032 (mM)        | Target $\text{Ca}^{2+}$ concentration        |
| $G_{\text{Na}}$  | 360 ( $\mu$ S)            | Initial Na conductance                       |
| $G_{\text{K}}$   | 120 ( $\mu$ S)            | Initial K conductance                        |
| $G_{\text{KCa}}$ | 60 ( $\mu$ S)             | KCa conductance                              |
| $g_{\text{Na}}$  | 180 ( $\mu$ S)            | Max. Na conductance                          |
| $g_{\text{K}}$   | 60 ( $\mu$ S)             | Max. K conductance                           |
| $g_{\text{KCa}}$ | 30 ( $\mu$ S)             | Max. K conductance                           |
| $g_{\text{Ca}}$  | 0.03 ( $\mu$ S)           | Max. $\text{Ca}^{2+}$ conductance            |
| $g_l$            | 1 ( $\mu$ S)              | Leak conductance                             |
| $V_l$            | -70 (mV)                  | Leak reversal potential                      |
| $V_{\text{K}}$   | -100 (mV)                 | K reversal potential                         |
| $V_{\text{Na}}$  | 50 (mV)                   | Na reversal potential                        |
| $V_{\text{Ca}}$  | 150 (mV)                  | $\text{Ca}^{2+}$ reversal potential          |
| $V_1$            | -50 (mV)                  | Morris-Lecar constant                        |
| $V_2$            | 10 (mV)                   | Morris-Lecar constant                        |
| $\Delta$         | 0.6 ( $\mu$ M)            | $\text{Ca}^{2+}$ influx rate                 |
| $k$              | 1/200 (1 / msec)          | $\text{Ca}^{2+}$ clearance rate              |
| $\gamma$         | -0.00047 (mM / mA / msec) | $\text{Ca}^{2+}$ current conversion constant |
| $\delta t$       | 0.01 (msec)               | Integration time step                        |

Table 1: Model parameters.

## References

- [1] L. F. Abbott and Gwendal LeMasson. Analysis of Neuron Models with Dynamically Regulated Conductances. *Neural Computation*, 5(6):823–842, November 1993.
- [2] Alison L. Barth and James F.A. Poulet. Experimental evidence for sparse firing in the neo-cortex. *Trends in Neurosciences*, 35(6):345–355, June 2012.
- [3] Mathilde Bonnefond and Ole Jensen. Alpha Oscillations Serve to Protect Working Memory Maintenance against Anticipated Distracters. *Current Biology*, 22(20):1969–1974, October 2012.
- [4] C. Borgers, S. Epstein, and N. J. Kopell. Background gamma rhythmicity and attention in cortical local circuits: A computational study. *Proceedings of the National Academy of Sciences*, 102(19):7002–7007, May 2005.
- [5] C. Borgers, S. Epstein, and N. J. Kopell. Gamma oscillations mediate stimulus competition and attentional selection in a cortical network model. *Proceedings of the National Academy of Sciences*, 105(46):18023–18028, November 2008.
- [6] Jonathan Cannon and Paul Miller. Synaptic and intrinsic homeostasis cooperate to optimize single neuron response properties and tune integrator circuits. *Journal of Neurophysiology*, 116(5):2004–2022, November 2016.
- [7] Jonathan Cannon and Paul Miller. Stable Control of Firing Rate Mean and Variance by Dual Homeostatic Mechanisms. *The Journal of Mathematical Neuroscience*, 7(1), December 2017.

- [8] Yueling Chen, Hui Zhang, Hengtong Wang, Lianchun Yu, and Yong Chen. The Role of Coincidence-Detector Neurons in the Reliability and Precision of Subthreshold Signal Detection in Noise. *PLoS ONE*, 8(2):e56822, February 2013.
- [9] Jeremiah Y Cohen, Mackenzie W Amoroso, and Naoshige Uchida. Serotonergic neurons signal reward and punishment on multiple timescales. *eLife*, 4, February 2015.
- [10] Nathaniel D Daw, Sham Kakade, and Peter Dayan. Opponent interactions between serotonin and dopamine. *Neural Networks*, 15(4-6):603–616, June 2002.
- [11] Joseph Feingold, Daniel J. Gibson, Brian DePasquale, and Ann M. Graybiel. Bursts of beta oscillation differentiate postperformance activity in the striatum and motor cortex of monkeys performing movement tasks. *Proceedings of the National Academy of Sciences*, 112(44):13687–13692, November 2015.
- [12] Jorge Golowasch, Michael Casey, L. F. Abbott, and Eve Marder. Network Stability from Activity-Dependent Regulation of Neuronal Conductances. *Neural Computation*, 11(5):1079–1096, July 1999.
- [13] Gabrielle J. Gutierrez, Timothy O’Leary, and Eve Marder. Multiple Mechanisms Switch an Electrically Coupled, Synaptically Inhibited Neuron between Competing Rhythmic Oscillators. *Neuron*, 77(5):845–858, March 2013.
- [14] Daniel Harnack, Miha Pelko, Antoine Chaillet, Yacine Chitour, and Mark C.W. van Rossum. Stability of Neuronal Networks with Homeostatic Regulation. *PLOS Computational Biology*, 11(7):e1004357, July 2015.
- [15] A. L. Hodgkin and A. F. Huxley. A quantitative description of membrane current and its application to conduction and excitation in nerve. *J Physiol*, 117(4):500–544, 1952.
- [16] M. P. Jadi and T. J. Sejnowski. Cortical oscillations arise from contextual interactions that regulate sparse coding. *Proceedings of the National Academy of Sciences*, 111(18):6780–6785, May 2014.
- [17] Monika Jadi, Alon Polsky, Jackie Schiller, and Bartlett W. Mel. Location-Dependent Effects of Inhibition on Local Spiking in Pyramidal Neuron Dendrites. *PLoS Computational Biology*, 8(6):e1002550, June 2012.
- [18] O. Jensen. Oscillations in the Alpha Band (9-12 Hz) Increase with Memory Load during Retention in a Short-term Memory Task. *Cerebral Cortex*, 12(8):877–882, August 2002.
- [19] Annelise Joseph and Gina G. Turrigiano. All for One But Not One for All: Excitatory Synaptic Scaling and Intrinsic Excitability Are Coregulated by CaMKIV, Whereas Inhibitory Synaptic Scaling Is Under Independent Control. *The Journal of Neuroscience*, 37(28):6778–6785, July 2017.
- [20] J. Lange, R. Oostenveld, and P. Fries. Reduced Occipital Alpha Power Indexes Enhanced Excitability Rather than Improved Visual Perception. *Journal of Neuroscience*, 33(7):3212–3220, February 2013.
- [21] G LeMasson, E Marder, and L. Abbott. Activity-dependent regulation of conductances in model neurons. *Science*, 259(5103):1915–1917, March 1993.
- [22] John E. Lisman and Ole Jensen. The Theta-Gamma Neural Code. *Neuron*, 77(6):1002–1016, March 2013.
- [23] Zheng Liu, Jorge Golowasch, Eve Marder, and L. F. Abbott. A Model Neuron with Activity-Dependent Conductances Regulated by Multiple Calcium Sensors. *The Journal of Neuroscience*, 18(7):2309–2320, April 1998.
- [24] Mikael Lundqvist, Jonas Rose, Pawel Herman, Scott L. Brincat, Timothy J. Buschman, and Earl K. Miller. Gamma and Beta Bursts Underlie Working Memory. *Neuron*, 90(1):152–164, April 2016.

- [25] Zachary F. Mainen and Terrence J. Sejnowski. Influence of dendritic structure on firing pattern in model neocortical neurons. *Nature*, 382(6589):363–366, July 1996.
- [26] Eve Marder, Timothy O’Leary, and Sonal Shruti. Neuromodulation of Circuits with Variable Parameters: Single Neurons and Small Circuits Reveal Principles of State-Dependent and Robust Neuromodulation. *Annual Review of Neuroscience*, 37(1):329–346, July 2014.
- [27] Eve Marder, Marie L Goeritz, and Adriane G Otopalik. Robust circuit rhythms in small circuits arise from variable circuit components and mechanisms. *Current Opinion in Neurobiology*, 31:156–163, April 2015.
- [28] M. Marinelli and J.E. McCutcheon. Heterogeneity of dopamine neuron activity across traits and states. *Neuroscience*, 282:176–197, December 2014.
- [29] H. Markram. Regulation of Synaptic Efficacy by Coincidence of Postsynaptic APs and EP-SPs. *Science*, 275(5297):213–215, January 1997.
- [30] B. W. Mel and J. Schiller. On the Fight Between Excitation and Inhibition: Location Is Everything. *Science Signaling*, 2004(250):pe44–pe44, September 2004.
- [31] C. Morris and H. Lecar. Voltage oscillations in the barnacle giant muscle fiber. *Biophysical Journal*, 35(1):193–213, July 1981.
- [32] Lyle Muller, Romain Brette, and Boris Gutkin. Spike-Timing Dependent Plasticity and Feed-Forward Input Oscillations Produce Precise and Invariant Spike Phase-Locking. *Frontiers in Computational Neuroscience*, 5, 2011.
- [33] T. O’Leary, A. H. Williams, J. S. Caplan, and E. Marder. Correlations in ion channel expression emerge from homeostatic tuning rules. *Proceedings of the National Academy of Sciences*, 110(28):E2645–E2654, July 2013.
- [34] Timothy O’Leary, Alex H. Williams, Alessio Franci, and Eve Marder. Cell Types, Network Homeostasis, and Pathological Compensation from a Biologically Plausible Ion Channel Expression Model. *Neuron*, 82(4):809–821, May 2014.
- [35] Erik J. Peterson and Bradley Voytek. Alpha oscillations control cortical gain by modulating excitatory-inhibitory background activity. *bioRxiv*, 185074, September 2017.
- [36] Alon Polsky, Bartlett W Mel, and Jackie Schiller. Computational subunits in thin dendrites of pyramidal cells. *Nature Neuroscience*, 7(6):621–627, June 2004.
- [37] Maxwell A. Sherman, Shane Lee, Robert Law, Saskia Haegens, Catherine A. Thorn, Matti S. Hämäläinen, Christopher I. Moore, and Stephanie R. Jones. Neural mechanisms of transient neocortical beta rhythms: Converging evidence from humans, computational modeling, monkeys, and mice. *Proceedings of the National Academy of Sciences*, 113(33):E4885–E4894, August 2016.
- [38] M. Siegel, E. Marder, and L. F. Abbott. Activity-dependent current distributions in model neurons. *Proceedings of the National Academy of Sciences*, 91(24):11308–11312, November 1994.
- [39] Sen Song, Kenneth D. Miller, and L. F. Abbott. Competitive Hebbian learning through spike-timing-dependent synaptic plasticity. *Nature Neuroscience*, 3(9):919–926, September 2000.
- [40] Gerd Tinkhauser, Alek Pogosyan, Huiling Tan, Damian M Herz, Andrea A Kühn, and Peter Brown. Beta burst dynamics in Parkinson’s disease OFF and ON dopaminergic medication. *Brain*, 140(11):2968–2981, November 2017.
- [41] Freek van Ede, Andrew J. Quinn, Mark W. Woolrich, and Anna C. Nobre. Neural Oscillations: Sustained Rhythms or Transient Burst-Events? *Trends in Neurosciences*, 41(7):415–417, July 2018.
- [42] Bradley Voytek and Robert T. Knight. Dynamic Network Communication as a Unifying Neural Basis for Cognition, Development, Aging, and Disease. *Biological Psychiatry*, 77(12):1089–1097, June 2015.

- [43] Bradley Voytek, Andrew S Kayser, David Badre, David Fegen, Edward F Chang, Nathan E Crone, Josef Parvizi, Robert T Knight, and Mark D'Esposito. Oscillatory dynamics coordinating human frontal networks in support of goal maintenance. *Nature Neuroscience*, 18(9): 1318–1324, September 2015.
- [44] Xiao-Jing Wang and György Buzsáki. Gamma Oscillation by Synaptic Inhibition in a Hippocampal Interneuronal Network Model. *The Journal of Neuroscience*, 16(20):6402–6413, October 1996.
- [45] Pengcheng Zhou, Shawn D. Burton, Adam C. Snyder, Matthew A. Smith, Nathaniel N. Urban, and Robert E. Kass. Establishing a Statistical Link between Network Oscillations and Neural Synchrony. *PLOS Computational Biology*, 11(10):e1004549, October 2015.
